# Supplementary material for: Examining the Role of Anxiety and Depression in Dietary Choices among College Students
Source: PubMed Central journal article supplement (PMC7400947; doi:10.3390/nu12072061), 2020-07-11
Supplement: nutrients-12-02061-s001.pdf [file nutrients-12-02061-s001.pdf]

**Table S1.** HEI components and scoring standards

| Components                 | Maximum points | Standard for maximum score                                        | Standard for minimum score of zero                                |
|----------------------------|----------------|-------------------------------------------------------------------|-------------------------------------------------------------------|
| Total fruits               | 5              | ≥0.8 cup equivalent per 1,000 kcal                                | No fruit                                                          |
| Whole fruits               | 5              | ≥0.4 cup equivalent per 1,000 kcal                                | No whole fruit                                                    |
| Total vegetables           | 5              | ≥1.1 cup equivalent per 1,000 kcal                                | No vegetables                                                     |
| Greens and beans           | 5              | ≥0.2 cup equivalent per 1,000 kcal                                | No dark green vegetables or legumes                               |
| Whole grains               | 10             | ≥1.5 cup equivalent per 1,000 kcal                                | No whole grains                                                   |
| Dairy                      | 10             | ≥1.3 cup equivalent per 1,000 kcal                                | No dairy                                                          |
| Total protein foods        | 5              | ≥2.5 cup equivalent per 1,000 kcal                                | No protein foods                                                  |
| Seafood and plant proteins | 5              | ≥0.8 cup equivalent per 1,000 kcal                                | No seafood or plant proteins                                      |
| Fatty acids                | 10             | (PUFAs <sup>a</sup> + MUFAs <sup>b</sup> )/SFAs <sup>c</sup> ≥2.5 | (PUFAs <sup>a</sup> + MUFAs <sup>b</sup> )/SFAs <sup>c</sup> ≤1.2 |
| Refined grains             | 10             | ≤1.8 oz equivalent per 1,000 kcal                                 | ≥4.3 oz equivalent per 1,000 kcal                                 |
| Sodium                     | 10             | ≤1.1 gram per 1,000 kcal                                          | ≥2.0 grams per 1,000 kcal                                         |
| Added sugars               | 10             | ≤6.5% of energy                                                   | ≥26% of energy                                                    |
| Saturated fats             | 10             | ≤8% of energy                                                     | ≥16% of energy                                                    |

*Note.* Reprinted from National Cancer Institute [50]. Retrieved from <https://epi.grants.cancer.gov/hei/developing.html>.

<sup>a</sup> PUFA=Polyunsaturated fatty acid. <sup>b</sup> MUFA=Monounsaturated fatty acid. <sup>c</sup> SFA=Saturated fatty acid.

**Table S2.** Descriptive statistics of main study variables and BMI (N=225)

|                            | Mean    | SD     | Skewness(SE) | Kurtosis(SE) |
|----------------------------|---------|--------|--------------|--------------|
| Age                        | 18.91   | 1.467  | 2.123(.163)  | 4.51(.32)    |
| GAD-7 score                | 5.15    | 5.09   | 1.32(.16)    | 1.49(.32)    |
| PHQ-9 score                | 5.88    | 4.90   | 1.16(.16)    | 1.20(.32)    |
| Whole grain <sup>a</sup>   | 2.19    | 3.33   | 1.39(.16)    | 0.52(.32)    |
| Dairy <sup>a</sup>         | 5.18    | 3.65   | -0.04(.16)   | -1.46(.32)   |
| Fatty acid <sup>a</sup>    | 5.20    | 3.90   | 0.01(.16)    | -1.56(.32)   |
| Sodium <sup>a</sup>        | 3.61    | 3.39   | 0.47(.16)    | -1.10(.32)   |
| Refined grain <sup>a</sup> | 4.95    | 3.86   | 0.01(.16)    | -1.54(.32)   |
| Saturated fat <sup>a</sup> | 5.70    | 3.61   | -0.26(.16)   | -1.32(.32)   |
| Sugar <sup>a</sup>         | 7.16    | 3.15   | -0.88(.16)   | -0.48(.32)   |
| Fruit <sup>a</sup>         | 3.45    | 4.13   | 0.67(.16)    | -1.30(.32)   |
| Vegetable <sup>a</sup>     | 4.26    | 3.48   | 0.45(.16)    | -1.19(.32)   |
| Protein <sup>a</sup>       | 6.03    | 3.11   | -0.15(.16)   | -0.97(.32)   |
| HEI total score            | 47.73   | 14.70  | 0.51(.16)    | -0.28(.32)   |
| Total caloric intake       | 1827.40 | 838.43 | 0.85(.16)    | 0.85(.32)    |
| BMI                        | 23.55   | 4.61   | 1.42 (.16)   | 2.57 (.32)   |

<sup>a</sup>HEI component scores

**Table S3.** Correlation of main study variables and BMI

|    | 1     | 2     | 3     | 4     | 5     | 6     | 7     | 8     | 9    | 10   | 11    | 12   | 13    | 14 |
|----|-------|-------|-------|-------|-------|-------|-------|-------|------|------|-------|------|-------|----|
| 1  | 1     |       |       |       |       |       |       |       |      |      |       |      |       |    |
| 2  | 0.80  | 1     |       |       |       |       |       |       |      |      |       |      |       |    |
| 3  | -0.00 | -0.03 | 1     |       |       |       |       |       |      |      |       |      |       |    |
| 4  | -0.02 | -0.02 | 0.05  | 1     |       |       |       |       |      |      |       |      |       |    |
| 5  | -0.03 | -0.00 | 0.18  | -0.50 | 1     |       |       |       |      |      |       |      |       |    |
| 6  | 0.11  | 0.16  | 0.10  | -0.08 | 0.04  | 1     |       |       |      |      |       |      |       |    |
| 7  | 0.09  | 0.09  | 0.35  | -0.01 | 0.06  | 0.24  | 1     |       |      |      |       |      |       |    |
| 8  | -0.00 | 0.02  | 0.18  | -0.48 | 0.63  | 0.09  | -0.91 | 1     |      |      |       |      |       |    |
| 9  | -0.21 | -0.23 | 0.11  | 0.11  | 0.15  | -0.42 | -0.01 | -0.06 | 1    |      |       |      |       |    |
| 10 | -0.01 | -0.02 | 0.14  | -0.06 | 0.21  | 0.23  | 0.18  | 0.28  | 0.06 | 1    |       |      |       |    |
| 11 | -0.05 | -0.11 | 0.10  | 0.08  | 0.08  | -0.13 | 0.14  | 0.01  | 0.26 | 0.15 | 1     |      |       |    |
| 12 | -0.07 | -0.03 | 0.18  | 0.03  | 0.06  | -0.02 | 0.27  | 0.02  | 0.12 | 0.08 | 0.29  | 1    |       |    |
| 13 | -0.04 | -0.03 | 0.57  | 0.02  | 0.49  | 0.27  | 0.53  | 0.40  | 0.29 | 0.59 | 0.47  | 0.47 | 1     |    |
| 14 | -0.23 | -0.20 | -0.09 | 0.13  | -0.14 | 0.18  | -0.01 | -0.21 | 0.00 | 0.03 | -0.10 | 0.16 | -0.02 | 1  |

*Note.* 1=GAD-7 score. 2=PHQ-9 score. 3=Whole grain. 4=Dairy. 5=Fatty acid. 6=Sodium. 7=Refined grain. 8=Saturated fat. 9=Sugar. 10=Fruit. 11=Vegetable. 12=Protein. 13=HEI total score. 14=Total caloric intake.

\* $p < .05$ . \*\* $p \leq .01$ . \*\*\* $p \leq .001$

**Table S4.** The effects of depression on food choices across sex

| HEI component scores       | <i>b</i> (SE) | <i>p</i> -value |
|----------------------------|---------------|-----------------|
| <b>Female</b>              |               |                 |
| Whole grain                | -.04(.05)     | .50             |
| Dairy                      | .01(.05)      | .92             |
| Fatty acid                 | -.02(.06)     | .78             |
| Sodium                     | .07(.05)      | .17             |
| Refined grain              | .07(.06)      | .21             |
| Saturated fat <sup>a</sup> | .07(.05)      | .19             |
| Sugar                      | -.17(.05)     | .00***          |
| Fruit <sup>a</sup>         | .00(.07)      | 1.00            |
| Vegetable <sup>a</sup>     | -.04(.06)     | .53             |
| Protein                    | -.01(.04)     | .81             |
| <b>Male</b>                |               |                 |
| Whole grain                | -.04(.05)     | .50             |
| Dairy                      | .01(.05)      | .92             |
| Fatty acid                 | -.02(.06)     | .78             |
| Sodium                     | .07(.05)      | .17             |
| Refined grain              | .07(.06)      | .21             |
| Saturated fat <sup>a</sup> | -.15(.08)     | .04*            |
| Sugar                      | -.17(.05)     | .00***          |
| Fruit <sup>a</sup>         | -.19(.08)     | .01**           |
| Vegetable <sup>a</sup>     | -.25(.07)     | .00***          |
| Protein                    | -.01(.04)     | .81             |

<sup>a</sup> Paths with significant sex differences

\**p*<.05. \*\**p*≤.01. \*\*\**p*≤.001.

**Table S5.** Comparison of USDA recommendation with the potential effects of severe anxiety and depression on sugar and saturated fat intake

|                     | HEI score | Contribution to energy (%) |
|---------------------|-----------|----------------------------|
| Sugar               |           |                            |
| USDA recommendation | 10        | ≤6.5                       |
| Severe anxiety      | 3.36      | +6.6                       |
| Severe depression   | 4.59      | +9                         |
| Saturated fat       |           |                            |
| USDA recommendation | 10        | ≤8%                        |
| Severe depression   | 4.05      | +3.24%                     |

**Table S6.** Comparison of USDA recommendation with the potential effects of severe depression on fruit and vegetable intake

|                     | HEI score | Total fruits consumed (cups per 1000 cal)     | Whole fruits consumed (cups per 1000 cal)     |
|---------------------|-----------|-----------------------------------------------|-----------------------------------------------|
| Fruits              |           |                                               |                                               |
| USDA recommendation | 10        | ≥.8                                           | ≥.4                                           |
| Max depression      | -5.13     | -.41                                          | -.21                                          |
| Vegetables          |           |                                               |                                               |
|                     |           | Total vegetables consumed (cups per 1000 cal) | Greens and beans consumed (cups per 1000 cal) |
| USDA recommendation | 10        | ≥1.1                                          | ≥.2                                           |
| Max depression      | -6.75     | -.74                                          | -.14                                          |
